# Supplementary material for: Serological test performance for bovine tuberculosis in cattle from herds with evidence of on-going infection in Northern Ireland
Source: PubMed Central journal article supplement (PMC8043403; doi:10.1371/journal.pone.0245655), 2021-04-13

# PLOS ONE

## Serological test performance for bovine tuberculosis in cattle from herds with evidence of on-going infection in Northern Ireland --Manuscript Draft--

|                                                                                                                                                                                      |                                                                                                                                                                                                                                                                                                                                                                                                                                                                                                                                                                                                                                                                                                                                                                                                                                                                                                                                                                                                                                                                                                                                                                                                                                                                                                                                                                                                                                                                                                                                                                                                                                                                                                                                                                                                                                                                                  |
|--------------------------------------------------------------------------------------------------------------------------------------------------------------------------------------|----------------------------------------------------------------------------------------------------------------------------------------------------------------------------------------------------------------------------------------------------------------------------------------------------------------------------------------------------------------------------------------------------------------------------------------------------------------------------------------------------------------------------------------------------------------------------------------------------------------------------------------------------------------------------------------------------------------------------------------------------------------------------------------------------------------------------------------------------------------------------------------------------------------------------------------------------------------------------------------------------------------------------------------------------------------------------------------------------------------------------------------------------------------------------------------------------------------------------------------------------------------------------------------------------------------------------------------------------------------------------------------------------------------------------------------------------------------------------------------------------------------------------------------------------------------------------------------------------------------------------------------------------------------------------------------------------------------------------------------------------------------------------------------------------------------------------------------------------------------------------------|
| <b>Manuscript Number:</b>                                                                                                                                                            | PONE-D-20-22608                                                                                                                                                                                                                                                                                                                                                                                                                                                                                                                                                                                                                                                                                                                                                                                                                                                                                                                                                                                                                                                                                                                                                                                                                                                                                                                                                                                                                                                                                                                                                                                                                                                                                                                                                                                                                                                                  |
| <b>Article Type:</b>                                                                                                                                                                 | Research Article                                                                                                                                                                                                                                                                                                                                                                                                                                                                                                                                                                                                                                                                                                                                                                                                                                                                                                                                                                                                                                                                                                                                                                                                                                                                                                                                                                                                                                                                                                                                                                                                                                                                                                                                                                                                                                                                 |
| <b>Full Title:</b>                                                                                                                                                                   | Serological test performance for bovine tuberculosis in cattle from herds with evidence of on-going infection in Northern Ireland                                                                                                                                                                                                                                                                                                                                                                                                                                                                                                                                                                                                                                                                                                                                                                                                                                                                                                                                                                                                                                                                                                                                                                                                                                                                                                                                                                                                                                                                                                                                                                                                                                                                                                                                                |
| <b>Short Title:</b>                                                                                                                                                                  | bTB serological test performance in Northern Ireland                                                                                                                                                                                                                                                                                                                                                                                                                                                                                                                                                                                                                                                                                                                                                                                                                                                                                                                                                                                                                                                                                                                                                                                                                                                                                                                                                                                                                                                                                                                                                                                                                                                                                                                                                                                                                             |
| <b>Corresponding Author:</b>                                                                                                                                                         | Lyanne Mary McCallan, PhD, BsC<br>Agri-Food and Biosciences Institute Stormont<br>BELFAST, NORTHERN IRELAND UNITED KINGDOM                                                                                                                                                                                                                                                                                                                                                                                                                                                                                                                                                                                                                                                                                                                                                                                                                                                                                                                                                                                                                                                                                                                                                                                                                                                                                                                                                                                                                                                                                                                                                                                                                                                                                                                                                       |
| <b>Keywords:</b>                                                                                                                                                                     | Mycobacterium bovis, IDEXX, Enfer, diagnostic tests, serological tests                                                                                                                                                                                                                                                                                                                                                                                                                                                                                                                                                                                                                                                                                                                                                                                                                                                                                                                                                                                                                                                                                                                                                                                                                                                                                                                                                                                                                                                                                                                                                                                                                                                                                                                                                                                                           |
| <b>Abstract:</b>                                                                                                                                                                     | <p>The ability to accurately identify infected hosts is the cornerstone of effective disease control and eradication programs. In the case of bovine tuberculosis, accurately identifying infected individual animals has been challenging as all available tests exhibit limited discriminatory ability. Here we assess the utility of two serological tests (IDEXX Mycobacterium bovis Ab test and Enfer multiplex antibody assay) and assess their performance relative to skin test (Single Intradermal Comparative Cervical Tuberculin; SICCT), gamma-interferon (IFNg) and post-mortem results in a Northern Ireland setting. Furthermore, we describe a case-study where one test was used in conjunction with statutory testing.</p> <p>Serological tests using samples taken prior to SICCT disclosed low proportions of animals as test positive (mean 3% positive), despite the cohort having high proportions with positive SICCT test under standard interpretation (121/921; 13%) or IFNg (365/922; 40%) results. Furthermore, for animals with a post-mortem record (n=286), there was a high proportion with TB visible lesions (27%) or with laboratory confirmed infection (25%). As a result, apparent sensitivities within this cohort was very low (<math>\leq 15\%</math>), however the tests succeeded in achieving very high specificities (96-100%). During the case-study, 7/670 (1.04%) samples from SICCT negative animals from a large chronically infected herd were serology positive, with a further 17 animals being borderline positive (17/670; 2.54%). Nine of the borderline animals were voluntarily removed, none of which were found to be infected post-mortem (no lesions/bacteriology negative). One serology test negative animal was subsequently found to have lesions at slaughter with M. bovis confirmed in the laboratory.</p> |
| <b>Order of Authors:</b>                                                                                                                                                             | <p>Lyanne Mary McCallan, PhD, BsC</p> <p>Cathy Brooks</p> <p>Claire Barry</p> <p>Catherine Couzens</p> <p>Fiona Jayne Young</p> <p>Jim McNair</p> <p>Andrew Byrne</p>                                                                                                                                                                                                                                                                                                                                                                                                                                                                                                                                                                                                                                                                                                                                                                                                                                                                                                                                                                                                                                                                                                                                                                                                                                                                                                                                                                                                                                                                                                                                                                                                                                                                                                            |
| <b>Additional Information:</b>                                                                                                                                                       |                                                                                                                                                                                                                                                                                                                                                                                                                                                                                                                                                                                                                                                                                                                                                                                                                                                                                                                                                                                                                                                                                                                                                                                                                                                                                                                                                                                                                                                                                                                                                                                                                                                                                                                                                                                                                                                                                  |
| <b>Question</b>                                                                                                                                                                      | <b>Response</b>                                                                                                                                                                                                                                                                                                                                                                                                                                                                                                                                                                                                                                                                                                                                                                                                                                                                                                                                                                                                                                                                                                                                                                                                                                                                                                                                                                                                                                                                                                                                                                                                                                                                                                                                                                                                                                                                  |
| <b>Financial Disclosure</b>                                                                                                                                                          | <p>This study was funded by the Department of Agriculture, Environment and Rural Affairs (DAERA) as part of the Evidence and Innovation Strategy under the grant "An assessment of commercially available serological tests for the detection of cattle infected with bovine tuberculosis" (grant no.: 15/3/09)</p> <p>Project Leaders: Dr J. McNair and Dr A. Byrne.</p>                                                                                                                                                                                                                                                                                                                                                                                                                                                                                                                                                                                                                                                                                                                                                                                                                                                                                                                                                                                                                                                                                                                                                                                                                                                                                                                                                                                                                                                                                                        |
| Enter a financial disclosure statement that describes the sources of funding for the work included in this submission. Review the <a href="#">submission guidelines</a> for detailed |                                                                                                                                                                                                                                                                                                                                                                                                                                                                                                                                                                                                                                                                                                                                                                                                                                                                                                                                                                                                                                                                                                                                                                                                                                                                                                                                                                                                                                                                                                                                                                                                                                                                                                                                                                                                                                                                                  |

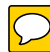

requirements. View published research articles from [PLOS ONE](#) for specific examples.

This statement is required for submission and **will appear in the published article** if the submission is accepted. Please make sure it is accurate.

#### Unfunded studies

Enter: *The author(s) received no specific funding for this work.*

#### Funded studies

Enter a statement with the following details:

- Initials of the authors who received each award
- Grant numbers awarded to each author
- The full name of each funder
- URL of each funder website
- Did the sponsors or funders play any role in the study design, data collection and analysis, decision to publish, or preparation of the manuscript?
- **NO** - Include this sentence at the end of your statement: *The funders had no role in study design, data collection and analysis, decision to publish, or preparation of the manuscript.*
- **YES** - Specify the role(s) played.

\* typeset

The funders had no role in study design, data collection and analysis, decision to publish, or preparation of the manuscript.

#### Competing Interests

Use the instructions below to enter a competing interest statement for this submission. On behalf of all authors, disclose any [competing interests](#) that could be perceived to bias this work—acknowledging all financial support and any other relevant financial or non-financial competing interests.

This statement **will appear in the published article** if the submission is accepted. Please make sure it is accurate. View published research articles from [PLOS ONE](#) for specific examples.

The authors have declared that no competing interests exist.

**NO authors have competing interests**

Enter: *The authors have declared that no competing interests exist.*

**Authors with competing interests**

Enter competing interest details beginning with this statement:

*I have read the journal's policy and the authors of this manuscript have the following competing interests: [insert competing interests here]*

\* typeset

**Ethics Statement**

Enter an ethics statement for this submission. This statement is required if the study involved:

- Human participants
- Human specimens or tissue
- Vertebrate animals or cephalopods
- Vertebrate embryos or tissues
- Field research

Write "N/A" if the submission does not require an ethics statement.

General guidance is provided below. Consult the [submission guidelines](#) for detailed instructions. **Make sure that all information entered here is included in the Methods section of the manuscript.**

Ethical approval not required as whole blood samples were drawn for bovine IFNg testing in compliance with EU Council Directive 64/432/EEC with subsequent use in this study approved by the Department of Agriculture, Environment and Rural Affairs (DAERA) in Northern Ireland.

**Format for specific study types**

**Human Subject Research (involving human participants and/or tissue)**

- Give the name of the institutional review board or ethics committee that approved the study
- Include the approval number and/or a statement indicating approval of this research
- Indicate the form of consent obtained (written/oral) or the reason that consent was not obtained (e.g. the data were analyzed anonymously)

**Animal Research (involving vertebrate animals, embryos or tissues)**

- Provide the name of the Institutional Animal Care and Use Committee (IACUC) or other relevant ethics board that reviewed the study protocol, and indicate whether they approved this research or granted a formal waiver of ethical approval
- Include an approval number if one was obtained
- If the study involved *non-human primates*, add *additional details* about animal welfare and steps taken to ameliorate suffering
- If anesthesia, euthanasia, or any kind of animal sacrifice is part of the study, include briefly which substances and/or methods were applied

**Field Research**

Include the following details if this study involves the collection of plant, animal, or other materials from a natural setting:

- Field permit number
- Name of the institution or relevant body that granted permission

**Data Availability**

Authors are required to make all data underlying the findings described fully available, without restriction, and from the time of publication. PLOS allows rare exceptions to address legal and ethical concerns. See the [PLOS Data Policy](#) and [FAQ](#) for detailed information.

No - some restrictions will apply

A Data Availability Statement describing where the data can be found is required at submission. Your answers to this question constitute the Data Availability Statement and **will be published in the article**, if accepted.

**Important:** Stating 'data available on request from the author' is not sufficient. If your data are only available upon request, select 'No' for the first question and explain your exceptional situation in the text box.

Do the authors confirm that all data underlying the findings described in their manuscript are fully available without restriction?

**Describe where the data may be found in full sentences. If you are copying our sample text, replace any instances of XXX with the appropriate details.**

- If the data are **held or will be held in a public repository**, include URLs, accession numbers or DOIs. If this information will only be available after acceptance, indicate this by ticking the box below. For example: *All XXX files are available from the XXX database (accession number(s) XXX, XXX).*
- If the data are all contained **within the manuscript and/or Supporting Information files**, enter the following: *All relevant data are within the manuscript and its Supporting Information files.*
- If neither of these applies but you are able to provide **details of access elsewhere**, with or without limitations, please do so. For example:

*Data cannot be shared publicly because of [XXX]. Data are available from the XXX Institutional Data Access / Ethics Committee (contact via XXX) for researchers who meet the criteria for access to confidential data.*

*The data underlying the results presented in the study are available from (include the name of the third party*

All relevant data are within the manuscript and its Supporting Information Files.

|                                                                                                                                                                                                                                         |                                                                                                                                                                                  |
|-----------------------------------------------------------------------------------------------------------------------------------------------------------------------------------------------------------------------------------------|----------------------------------------------------------------------------------------------------------------------------------------------------------------------------------|
| <p><i>and contact information or URL).</i></p> <ul style="list-style-type: none"><li>• This text is appropriate if the data are owned by a third party and authors do not have permission to share the data.</li></ul> <p>* typeset</p> |                                                                                                                                                                                  |
| Additional data availability information:                                                                                                                                                                                               | Tick here if the URLs/accession numbers/DOIs will be available only after acceptance of the manuscript for publication so that we can ensure their inclusion before publication. |

1 **Serological test performance for bovine tuberculosis in cattle from herds**  
2 **with evidence of on-going infection in Northern Ireland**

3 Running title: bTB serological test performance in Northern Ireland

4 **McCallan, L. M. <sup>a#</sup>, Brooks, C. <sup>a</sup>, Barry, C. <sup>a</sup>, Couzens, C. <sup>a</sup>, Young, F. J. <sup>a</sup>, McNair, J. <sup>a\*</sup>,**  
5 **Byrne, A.W. <sup>a, b\*^</sup>**

6 <sup>a</sup> *Agri-food and Biosciences Institute, Stormont, Belfast, Northern Ireland BT4 3SD.*

7 <sup>b</sup> *School of Biological Sciences, Queen's University Belfast, Belfast, Northern Ireland.*

8 # Corresponding author: [Lyanne.McCallan@afbini.gov.uk](mailto:Lyanne.McCallan@afbini.gov.uk); +44 028 9051 9487

9 \* joint senior author; ^ Current address: One-Health Scientific Support Group, Department of  
10 Agriculture, Food and the Marine (DAFM), Agriculture House, Dublin 2, Ireland.

11

12 Wordcount: 3501 (not including Materials and Methods, References, tables, or figure  
13 legends)

## 14 **Abstract**

15 The ability to accurately identify infected hosts is the cornerstone of effective disease control  
16 and eradication programs. In the case of bovine tuberculosis, accurately identifying infected  
17 individual animals has been challenging as all available tests exhibit limited discriminatory  
18 ability. Here we assess the utility of two serological tests (IDEXX *Mycobacterium bovis* Ab  
19 test and Enfer multiplex antibody assay) and assess their performance relative to skin test  
20 (Single Intradermal Comparative Cervical Tuberculin; SICCT), gamma-interferon (IFN $\gamma$ ) and  
21 post-mortem results in a Northern Ireland setting. Furthermore, we describe a case-study  
22 where one test was used in conjunction with statutory testing.

23 Serological tests using samples taken prior to SICCT disclosed low proportions of animals as  
24 test positive (mean 3% positive), despite the cohort having high proportions with positive  
25 SICCT test under standard interpretation (121/921; 13%) or IFN $\gamma$  (365/922; 40%) results.  
26 Furthermore, for animals with a post-mortem record (n=286), there was a high proportion  
27 with TB visible lesions (27%) or with laboratory confirmed infection (25%). As a result,  
28 apparent sensitivities within this cohort was very low ( $\leq 15\%$ ), however the tests succeeded in  
29 achieving very high specificities (96-100%). During the case-study, 7/670 (1.04%) samples  
30 from SICCT negative animals from a large chronically infected herd were serology positive,  
31 with a further 17 animals being borderline positive (17/670; 2.54%). Nine of the borderline  
32 animals were voluntarily removed, none of which were found to be infected post-mortem (no  
33 lesions/bacteriology negative). One serology test negative animal was subsequently found to  
34 have lesions at slaughter with *M. bovis* confirmed in the laboratory.

35 **Keywords:** *Mycobacterium bovis*, IDEXX, Enfer, diagnostic tests, serological tests

36



## 37 **Introduction**

38 Bovine tuberculosis is a globally distributed infectious disease. The impact of infection in  
39 cattle at the national and local level can be profound (1, 2). For example, in Northern  
40 Ireland legislation is in place, supported by the United Kingdom and the European Union,  
41 to control this disease with the eventual aim of total eradication (3). In practical terms,  
42 disease control across Northern Ireland is implemented through the single intradermal  
43 comparative cervical tuberculin (SICCT) test and through carcass inspection at abattoirs  
44 where cattle are slaughtered (3). Animals identified as skin test reactors, either by  
45 standard or severe test interpretation, are removed for slaughter by compulsory order and  
46 examined post-mortem. Furthermore, all animals slaughtered at abattoirs in Northern  
47 Ireland are examined for the presence of tuberculous lesions. Clinical material collected  
48 during meat inspection is cultured for the presence of acid-fast bacteria with subsequent  
49 identification of species and strain type (4).

50 Despite the introduction of statutory control measures to identify and remove infected  
51 cattle, bovine TB is a persistent problem in Northern Ireland (5). The epidemiology of  
52 disease is complicated by the presence of infection in wildlife (6, 7), and the **potential**  
53 **confounding effects of concurrent infections** (8, 9, 10). Current diagnostic tests applied to  
54 cattle are not sufficiently sensitive to identify all infected animals and to remove them  
55 before infection is spread (11-14). This is despite the introduction and widespread use of  
56 the interferon gamma release assay (IFN $\gamma$ ; 15) to augment the bovine TB testing regime  
57 and to support the front-line tests (16). In combination, meat inspection, the skin test and  
58 IFN $\gamma$  tests will identify a significant number of infected cattle, but not all (17). It is  
59 therefore important to investigate and validate tests or improved test strategies that will  
60 broaden the capacity to identify infected animals.

61 The development of serology-based assays has been very useful for diagnosis where there  
62 is a Th2 type immune response. Such assays can be high throughput, relatively  
63 inexpensive and blood samples can be submitted to the laboratory a substantial time after  
64 they have been taken from the animal. However, with certain diseases a Th1 type immune  
65 responses predominates and antibody tests are largely inappropriate. This is usually the  
66 case with bovine TB when following infection, the immune response is influenced by T-  
67 cells that direct and maintain a response dominated by IFN $\gamma$  release (18). Should disease  
68 progress and the burden of infection increase then the immune response changes subtly to  
69 a Th2 type where B-cells release antibody (19). In this situation and in the absence of cell  
70 mediated responses that can be exploited using the skin test or the IFN $\gamma$  assay, an  
71 antibody assay may prove useful in the diagnosis of disease. In order to assess the role of  
72 antibody tests within a disease control programme that is already based on cell mediated  
73 responses, we instigated a study that was centred on bovine TB diseased cattle and at-risk  
74 herds. In the study reported here, we compared results from two blind tested serological  
75 tests (IDEXX *M. bovis* Ab test and Enfer multiplex serological test) with the skin test,  
76 post-mortem examination, culture confirmation and the IFN $\gamma$  assay in order to define the  
77 utility of serology as a potential diagnostic test. We also report on a case-study where one  
78 of the serological tests (IDEXX) was used in a large herd where there was a recent  
79 chronic history of bTB, and where statutory tests were failing to clear infection.

80

## 81 **Materials and Methods**

### 82 *Whole blood sampling*

83 Samples intended for analysis were taken from cattle from Northern Ireland herds that were  
84 deemed to have a  bovine TB problem and were eligible for inclusion in the IFN $\gamma$  testing  
85 scheme operated by the Department for Agriculture, Environment and Rural Affairs  
86 (DAERA), Northern Ireland (see 16, 17). Animals under six months old were excluded from  
87 IFN $\gamma$  testing and therefore not included in the analysis. Individual blood samples were taken  
88 just prior to the inoculation of tuberculin on day one of the skin test and were submitted to  
89 the laboratory within 8 hours of collection. Whole blood was removed and stimulated with  
90 antigens, to be tested later for IFN $\gamma$  release. Residual whole blood was centrifuged for 15  
91 minutes to separate plasma from blood cells. Clarified plasma samples were removed  
92 individually and stored at -20°C for serological testing. Plasma samples from 407 animals  
93 positive to SICCT or IFN $\gamma$  and 515 ante-mortem test negative animals (SICCT and IFN $\gamma$   
94 negative) were selected for serological testing.

95

### 96 *The skin test and carcass inspection at abattoir*

97 All animals included in the study were skin tested under Annex A, Council Directive  
98 64/432/EEC using Prionics tuberculins (PPD<sub>bovis</sub> and PPD<sub>avium</sub>). Each tuberculin (0.1mL) was  
99 injected intradermally at 3000 IU (PPD<sub>bovis</sub>) or 2500 IU (PPD<sub>avium</sub>) on day one of the test.  
100 Skin thickness measurement, pre- and 72 hours post-injection was used to calculate increased  
101 skin thickness and to indicate the diagnostic outcome of the test. Skin test positive cattle  
102 (standard interpretation, 4mm) were submitted for slaughter at a designated abattoir in  
103 Northern Ireland where carcass inspection was carried out to reveal the presence or absence  
104 of tuberculous lesions. Carcass inspection was carried out following a standardised protocol

105 defined by DAERA with head (sub-mandibular, parotid and retro-pharyngeal), chest  
106 (bronchial and mediastinal), abdominal (mesenteric) and carcass (prescapular, popliteal, iliac  
107 and precrural) lymph nodes examined as well as the lungs, pleura and peritoneum. Tissue  
108 samples were taken from tissues with and without tuberculous-like lesions and submitted to  
109 the culture laboratory. Information pertinent to the skin test, and abattoir inspection as well as  
110 laboratory test data was recorded onto the Animal and Public Health Information System  
111 (APHIS) operated by DAERA.

112

### 113 ***Blinded approach to laboratory tests***

114 Sample testing was conducted using a single blind study design in which sample information,  
115 including herd number, ear tag, and statutory laboratory test results, was withheld from  
116 technical staff. This was achieved by assigning arbitrary codes to plasma samples upon  
117 collection. The arbitrary codes and corresponding sample information was stored in a  
118 database which was controlled by a senior technician. In compliance with data protection,  
119 information relating to herd keepers, herds, animals, or samples was withheld.

120

### 121 ***The Interferon gamma release assay (IFN $\gamma$ test)***

122 Whole blood samples were tested for IFN $\gamma$  release using the Bovigam assay (Prionics,  
123 Switzerland) accredited by the United Kingdom Accreditation Service (UKAS). The  
124 methodology has been described previously (15). Briefly, whole blood samples were received  
125 into the laboratory within eight hours of removal from the animal and stimulated overnight  
126 with pokeweed mitogen (2 $\mu$ g/ml), phosphate buffered saline, PPD<sub>bovis</sub> (72 $\mu$ g/ml), PPD<sub>avium</sub>  
127 (36 $\mu$ g/ml) and ESAT-6 (0.5 $\mu$ g/ml). After overnight culture at 37°C, plasma supernatant fluids

128 were removed and stored prior to test by ELISA. The ELISA was carried out according the  
129 manufacturer's protocol with regards to reagent dilutions, incubation times and plate wash  
130 regimes. Individual sample results were accepted and recorded if reagent control and quality  
131 assurance standards were met. Those samples with Net PPD<sub>b</sub> and PPD<sub>b</sub>-PPD<sub>a</sub> optical density  
132 (OD) indexes of 0.1 or greater were positive and those less than 0.1 OD units were negative.

133

#### 134 ***Selection of serological tests***

135 Tests to be evaluated were based on commercial availability and/or through fulfilling the  
136 requirements to test samples via a public tender established by AFBI. Two test providers  
137 were identified (see below) who satisfied the requirements.

138

#### 139 ***The IDEXX ELISA for antibodies***

140 IDEXX *M. bovis* ELISA kits were purchased from the manufacturer and the assay was  
141 carried out according to the manufacturer's protocol. The IDEXX ELISA is a commercially  
142 available kit. This ELISA has a 96 well microtitre plate format that detects antibodies to two  
143 *Mycobacterium tuberculosis* complex antigens (MPB70 and MPB83) known to be serological  
144 targets in *Mycobacterium bovis* infections. Briefly, plasma samples were diluted to 1 in 50 in  
145 PBS and tested in duplicate. One hundred microliters of reagents were added to wells in  
146 duplicate and incubated for 60 minutes then washed 6 times. Assay positive and negative test  
147 control reagents were used to validate each microtitre plate and provided data to calculate the  
148 test result [sample - nil / positive - nil (S/P ratio)]. Test results were interpreted as per  
149 manufacturer's instructions as follows: an S/P ratio greater or equal to 0.30 was considered  
150 positive and a ratio less than 0.3 was negative.

151 *The Enfer provisioned antibody assay*

152 An Enfer provisioned assay was carried out by Enfer staff at their Naas laboratories (Enfer  
153 ltd, Naas, Co Kildare). All tests were blinded, with no information on the epidemiological  
154 situation (e.g. within-herd prevalence) from which animals were selected provided to Enfer.  
155 It should be noted that this Enfer multiplex antibody assay is not a commercially available as  
156 a standalone kit, but testing was provided in fulfilment of commercial services as part of a  
157 commercial tender to AFBI. The basis for this assay methodology has been described  
158 previously (20). For this study, the defined antigens used in this assay were MPB83, ESAT-6,  
159 CFP-10 and MPB70. Enfer scientific printed the bespoke multiplex according to the tender  
160 requirements, and carried out the screening, utilising bespoke software to read the multiplex  
161 plates (20). It should also be noted that this study did not include protein fusions and  
162 cocktails, which may have been used in other studies employing the Enfer test. Plasma  
163 samples were diluted to 1 in 250 (in Enfer sample buffer A) and added to each well and  
164 incubated and agitated for 30 minutes. After washing, horseradish conjugated anti-bovine  
165 immunoglobulin was added, incubated and washed again. Substrate was added and signals  
166 were captured during a 45 second exposure stored as relative light units. The manufacturer  
167 recommends that a positive result is recorded when a minimum of any two antigens are test  
168 positive. For the purposes of this study the Enfer raw data were interpreted in two different  
169 ways. For the Enfer 2ag interpretation, a positive result was recorded if plasma samples were  
170 test positive against either MPB70 or MPB83. For the Enfer 4ag interpretation, a positive  
171 result was recorded if any two antigens, from MPB70, MPB83, ESAT-6 and CFP-10, were  
172 test positive (in line with Enfer low specificity 2ag interpretation).

173

174

175 *Laboratory confirmatory tests for Mycobacteria*

176 Clinical samples removed from animals at slaughter were submitted to a containment level-3  
177 laboratory for preparation, decontamination and inoculation onto solid and liquid media.  
178 Culture procedures at the Statutory TB Laboratories at the Agri-food and Biosciences  
179 Institute have been described extensively previously (e.g.17, 21). Tissue structure was  
180 disrupted using either ribolysation or grinding with sterile sand in a pestle and mortar. Prior  
181 to inoculation, clinical samples were decontaminated using 5% oxalic acid for a maximum of  
182 30 min and washed twice with sterile PBS. Samples were then inoculated onto Lowenstein-  
183 Jensen and Stonebrink slopes, as well as into Mycobacterial Growth Indicator Tubes (MGIT)  
184 containing PANTA. At 56 days post inoculation, cultures were examined for the presence of  
185 acid-fast mycobacteria and if present were further analysed using a spoligotype method (22)  
186 to identify mycobacterial species and sub-type. Also, a selection of tissues that were lesion  
187 positive were fixed in neutral buffered formalin solution and prepared for additional  
188 histological examination.

189

190 *Analysis*

191 Throughout we estimated the Area Under the receiver operator Curve (AUC) as an assessment  
192 of the ability of the serological test to discriminate between (apparent) infection states. The  
193 AUC is measured on a continuous scale from 0 to 1; an AUC of 0.5 is no better than random,  
194 with values >0.7 considered an “adequate” diagnostic (23). Apparent sensitivity, specificity,  
195 positive predictive value and negative predictive value was calculated and reported against  
196 alternative/pseudo-gold standards of infection status.

197 Each diagnostic was compared against the skin test (SICCT) result, IFN $\gamma$  test result and post-  
198 mortem status of the animal, giving apparent/relative performance indices. We also used the

199 definition adopted by Whelan et al, (24) to define “true” infection status. In this case, infection  
200 was defined by an animal being positive to the skin test (SICCT standard interpretation), having  
201 a visible lesion at slaughter and having a bacteriological confirmation result (positive to  
202 histology and/or microbiological culture). Being free of infection, negative animals were  
203 negative to SICCT, without lesions at slaughter and without post-mortem bacteriological  
204 confirmation. In addition, we used a combination of IFN $\gamma$ , SICCT, VL and culture  
205 confirmation, to assess the relative performance of the serology tests.

206 The relationship between the test status and the independent variables was modelled throughout  
207 using binary logit regression models. A random effect for herd id (to account for potential  
208 clustering effects) was included if significant and was tested using a likelihood ratio test. We  
209 used  $\chi^2$  tests and binary logit models to assess whether there was any association between  
210 animal sex, age at blood test sample, breed type (dairy production Holstein/Friesian vs. other  
211 breeds) and the probability of a positive serological test results being disclosed.

212 Throughout, the dataset was organised using Microsoft excel, while all statistical analysis was  
213 undertaken using Stata version 14 (Stata Corp., Texas, USA, 2015).

214

### 215 *A problem herd-based case study*

216 A case study centred on a relatively large (approximately 1000 cattle over the period) dairy  
217 herd was carried out to assess the utility of antibody detection where animals were known to  
218 be infected and resolution of the problem was proving to be difficult. This particular herd had  
219 a seemingly intractable chronic bovine TB problem which originated between 2002 and  
220 2004. Initially, a relatively small number of bovine TB breakdowns were recorded with  
221 subsequent confirmation of infection caused by *Mycobacterium bovis*. From 2008 onward,



222 the rate of skin test positive cattle increased significantly with a total of 148 skin test positive  
223 animals identified between December 2008 and May 2015 as well as 2 cases of lesions at  
224 routine slaughter, i.e. skin test negative cattle sent for slaughter with confirmed tuberculous  
225 lesions disclosed during carcass inspection. Given the disease history of this herd following  
226 routine TB diagnostic investigations, high risk cohorts of cattle (ante-mortem negative in  
227 contact animals) within this herd were blood sampled and tested for the presence of  
228 antibodies to *M. bovis* using IDEXX serology (OIE approved) in 2016. The fundamental  
229 rationale was that detecting antibody in cattle that were skin test negative may indicate the  
230 presence of infection in animals that were considered to be anergic, that is, unresponsive to  
231 cell mediated tests such as the skin test and IFN $\gamma$  assay.

232

### 233 *Data availability*

234 All data was provided through the APHIS dataset, for which the data controller is DAERA.  
235 All data from which inferences were made are provided within the paper, raw test data has  
236 been deposited in an online repository (25). Additional information on these data is available  
237 from DAERA, Northern Ireland (<https://www.daera-ni.gov.uk/access-information-0>;  
238 [daera.informationmanager@daera-ni.gov.uk](mailto:daera.informationmanager@daera-ni.gov.uk)) and would be subject to appropriate GDPR and  
239 Data Protection regulations (UK) in relation to individual herd keepers/herds.

240 **Results**

241 *Agreement and comparison*

242 Overall, there were 922 animals with test result data; all animals had test results for IFN $\gamma$  and  
243 IDEXX, 921 had SICCT, 920 had Enfer 2ag and Enfer 4ag results, while 284 animals had a  
244 post-mortem result. These animals came from 64 herds with recent bTB breakdowns, with a  
245 mean of 14.39 animals tested per herd (Median: 9.5; Std. Dev.: 13.39; Range: 1-76). The  
246 proportions of animals positive to each of the individual tests are as follows: 121/921  
247 (13.14%) animals were SICCT positive, 365/922 (39.59%) IFN $\gamma$  positive, 40/921 (4.34%)  
248 IDEXX positive, 30/921 (3.26%) Enfer 2ag positive, 13/921 (1.41%) Enfer 4ag positive, and  
249 78/284 (27.46%) animals were found to have TB like lesions at post-mortem.

250 There was significant ( $p < 0.001$ ) moderate agreement **between the serological tests ranging**   
251 **from a kappa of 0.40 (IDEXX and Enfer 4ag) to 0.55 (Enfer 2ag and Enfer 4ag).** Of the  
252 animals with visible lesions found at post-mortem, the proportions deemed positive were not  
253 significantly different between the serological test types: IDEXX 10/68 (14.71%), Enfer 2ag  
254 9/68 (13.24%), Enfer 4ag 7/68 (10.29%) (McNemar's test: Enfer 2ag vs. IDEXX:  $p = 0.65$ ;  
255 Enfer 4ag vs. IDEXX:  $p = 0.16$ ; Enfer 4ag vs. Enfer 2ag:  $p = 0.18$ ). Similarly, there were no  
256 differences between test types, when using bacteriological confirmation as the infection status  
257 diagnostic ( $p > 0.25$ ).

258

259 *Serology test performance in comparison with single or combined diagnostic techniques*

260 The relative performance of the serological tests in comparison with single ante-mortem  
261 diagnostics (Table 1), post-mortem diagnostics (Table 2) and combined tests (Table 3 and  
262 Table 4) are presented below.

263 Relative to single ante-mortem tests (mean test prevalence 27%; Table 1), the serological  
264 tests did not disclose a high proportion of test-positive animals (mean 3% positive). This  
265 resulted in the tests exhibiting low apparent sensitivities, averaging 5.73% (range: 4.13% -  
266 9.09%). However, the apparent specificities were always very high, with a mean of 97.82%  
267 (96.40% - 99.50%). While there was a significant positive relationship between serological  
268 test result and statutory ante-mortem outcome, the discriminatory ability of the tests were  
269 always poor (mean AUC: 0.52).

270 Similar results were found when post-mortem diagnostic techniques were used as the  
271 apparent infection status (Table 2). Due to the low sensitivity of the serological antibody  
272 tests, the mean test prevalence was always low (mean test prevalence 4.92%) relative to the  
273 proportion of animals with lesions or post-mortem confirmed infection (mean prevalence  
274 26%).

275 Using similar criteria to Whelan et al. (24) to define animals as “truly” infected and non-  
276 infected, we found that the serological tests exhibited poor sensitivity (9.09% - 13.64%;  
277 Table 3). Utilising IFN $\gamma$  test results, as an additional criterion (Table 4), suggested again that  
278 the serological tests exhibited low sensitivities, however the three serological tests achieved  
279 100% apparent specificities.

280 Table 5 gives the breakdown of animal ante-mortem test results in relation to each serological  
281 test result. Overall, 8 (8/513; 1.56%), 2 (2/513; 0.39%), and 17 (17/514; 3.31%) animals were  
282 ante-mortem test negative, that were deemed serologically test positive to Enfer 2ag, Enfer  
283 4ag and IDEXX, respectively

284 Table 6 gives a breakdown of animals with post-mortem confirmed *M. bovis* infection, that  
285 were skin-test, IFN $\gamma$ , or either skin-test/ IFN $\gamma$  negative. Enfer 2ag and IDEXX both disclosed  
286 as positive 3/19 (15.79%) SICCT false-negative animals. The Enfer 4ag test disclosed two

287 animals of these 19 animals as positive. However, none of the 14 post-mortem confirmed  
288 animals that were as IFN $\gamma$  negative were found to be serologically positive. Overall, 6 of the  
289 animals with confirmed infection were missed by both SICCT and IFN $\gamma$   
290 tests (6/286; 2.10%), and none of these were disclosed using any of the serological antibody  
291 tests.

292

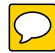

293 **Sex, age and breed associations with serological test results**

294 There was a lack of evidence in support for an association between sex on the probability of  
295 an animal disclosing as serological positive across all tests (OR 95%CI straddled 0 for all  
296 **models**;  $p > 0.05$ ; Enfer2 ag positive: Males 3.1%; Females 3.3%; Enfer 4ag positive: Males  
297 3.1%; Females 1.1%; IDEXX positive: Males 4.3%; Females 4.4%). Similarly, there was  
298 limited evidence of an age effect on the probability of animals disclosing with serological  
299 positive test (OR 95%CI straddled 0 for all models;  $p > 0.08$ ; Enfer 2ag positive vs. negative  
300 mean age (SD): 4.2 (3.1), 3.6 (2.8); Enfer 4ag positive vs. negative: 4.8 (3.7), 3.6 (2.8);  
301 IDEXX positive vs. negative mean age: 3.7 (3.1), 3.6 (2.8)). Overall, 47% of all animals were  
302 Holstein/Friesian dairy breed; 2.8% of these dairy breed animals were positive to Enfer 2ag  
303 relative to 3.7% for other breeds (Pearson  $\chi^2$  (df: 1) = 0.612; P = 0.434). For IDEXX, 3.7%  
304 of dairy animals were positive, but 4.9% of other breeds were positive (Pearson  $\chi^2$  (df: 1) =  
305 0.827; P = 0.363). There was a greater difference in the proportion disclosed positive between  
306 breeds for the Enfer 4ag test, with 0.23% of dairy animals disclosing positive in comparison  
307 with 2.5% for other breed animals ((Pearson  $\chi^2$  (df:1) = 8.185; P = 0.004). However, only  
308 one of the dairy animals (1/433) disclosed with a positive test.

309

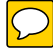

310 **A problem herd-based case study**

311 In total, 670 samples from cattle were blood sampled having been selected on the basis of  
312 being high risk cohorts of animals where the infection was most prevalent (ante-mortem  
313 negative in-contact animals). Using the manufacturer's recommended S/P ratio cut-off value  
314 of 0.3, seven samples were positive ( $\geq 0.3$ ) and 663 samples were negative ( $\leq 0.3$ ). Five  
315 samples were clearly positive ( $> 0.3$ ), two samples were just above the threshold (0.340 and  
316 0.331) and all the remaining samples were negative. However, 17 samples had S/P ratios just  
317 below the cut-off value, ranging from 0.271 to 0.113.

318 Following release of the serology results and discussions with the herd keeper, nine animals  
319 were voluntarily surrendered for slaughter. Seven of the nine surrendered animals were  
320 serologically positive with S/P ratios ranging from 0.331 to 1.424 and the remaining 2  
321 animals were negative by IDEXX (S/P ratios of 0.157 and 0.223). At post-mortem  
322 examination, all cattle were designated non-visibly lesioned and clinical samples from the  
323 lung associated lymph nodes were submitted for laboratory tests. All samples were culture  
324 negative for *M. bovis*. Subsequent to this serology test-based investigation, one animal which  
325 was serology negative and submitted for voluntary slaughter, was examined and found to be  
326 visibly lesioned. Clinical samples from this animal were culture positive with *M. bovis*  
327 confirmed by spoligotype.

328

329 **Discussion**

330 During the present study, we investigated two serological tests for their relative performance  
331 in at-risk herds in Northern Ireland. In comparison with previous work by our group (14),  
332 samples for serology testing were taken prior to the SICCT tuberculin test. This sampling  
333 approach was decided upon to allow evaluation of serology as a stand-alone test in the

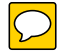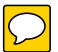

334 absence of skin testing. Whilst serology appears attractive, being relatively low cost and high  
335 throughput, this would not necessarily be true if skin testing was required prior to employing  
336 serological tests. Overall, our results suggested that the tests can achieve very high levels of  
337 apparent specificity. However, our results suggested that these tests failed to identify most  
338 animals with pathology or confirmed *M. bovis* infection post-mortem.

339 Research from Spain has shown when serology tests were evaluated prior to the tuberculin  
340 test, serological test performance was reduced relative to tests undertaken with samples after  
341 the tuberculin test (27, 29). Samples taken from a cohort of animals in this Spanish study  
342 prior to skin testing suggested that the serology tests examined exhibited a sensitivity of  
343 23.9%-32.6% (*M. bovis* Ab Test (IDEXX) & Enferplex TB assay, respectively). For animals  
344 sampled post-skin test, the beneficial anamnestic effect was most pronounced 15 days post-  
345 intradermal testing, achieving sensitivity estimates of 66.7%-85.2%. The effect was apparent  
346 by the number of animals disclosed as serology test positive when tested prior to skin testing  
347 (10.7%; 6/56), 72hrs after skin testing (7.1%; 4/56) and 15 days after testing (57.1%; 32/56).  
348 In the current study, a small proportion of animals were disclosed as serology positive (mean  
349 3% positive). However, during another study in Northern Ireland, we found a higher  
350 proportion of animals were disclosed as positive when prevalence was higher (86% SICCT  
351 test reactors) and testing occurred after skin testing (14). The proportion serology positive in  
352 that cohort was 39.02-62.20% positive, with apparent sensitivities relative to post-mortem  
353 confirmed infection estimated to be 68-82%. These results suggest that maximising the  
354 beneficial effects of serology testing may occur if samples are taken after skin testing. Such  
355 boosting/priming effects have been described before in cattle in several studies (27, 28, 32-  
356 35) and in other species also (see 36). Two antigens used in the tests assessed during the  
357 present study are known to be boosted by skin testing (MPB83 and MPB70; 35). Such effects

358 have led to some authorities to require follow-up serology testing during statutory tests, for  
359 example with camelids in Wales (36).

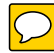

360 In the present study, a small proportion of **infected** but SICCT negative animals were  
361 identified by the serological tests (2-3/19 animals; 10.53%- 15.79%). This suggests that, in  
362 the absence of other ancillary testing, serological tests could be useful to identify part of this  
363 subpopulation. Previous research found of 60 truly infected SICCT negative or inconclusive  
364 animals, 53 (88.3%) were disclosed as positive using a multiplex ELISA test (24). It is hard  
365 to account for the relatively poorer detection rate in our study relative to Whelan et al. (24),  
366 but the discrepancy can partly be explained by the relatively small number of SICCT  
367 negative, *M. bovis* confirmed animals available in the present study. Employing exact  
368 binomial confidence intervals around the proportion, suggests significant uncertainty in our  
369 estimate (exact CI: 3.38% - 39.58%).

370 Another potential reason for the differing outcomes from this study and some other studies  
371 using the Enfer test platform, is that there was a limited set of antigens used in the current  
372 analysis, namely MPB70, MPB83, ESAT-6 and CFP10. The Enfer multiplex can detect  
373 antibody activity to 25 antigens in a single well in a 96-well plate array format (20).

374 However, to make cross-comparisons, only the most commonly used antigens were used  
375 during the present study. Such issues do not arise with the IDEXX **M. bovis** Ab test, as it is a  
376 standard commercial kit. Additionally, differing outcomes from this study and other studies  
377 using the IDEXX or Enfer test formats could be ascribed to the fact that this study tested  
378 plasma rather than serum, however, it should be noted both tests are marketed for use with  
379 bovine serum and plasma.

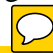

380 In Northern Ireland, IFN $\gamma$  is routinely used in herds with problems clearing infection (**e.g. see**  
381 16, 17). We found in this study, that when IFN $\gamma$  was used instead of, or in parallel with,  
382 SICCT, there were no additional *M. bovis* confirmed animals identified by the serological

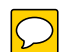

383 tests employed. This suggests, where both SICCT and IFN $\gamma$  are used together, there may be  
384 limited opportunities to detect additional missed infected animals using serological tests.  
385 Casal et al. (29), however, suggests that in very high prevalence regions there may be value  
386 in parallel interpretation of cellular and antibody detection techniques to maximise  
387 sensitivity.

388 During the case study presented, few animals were disclosed as serologically positive from a  
389 large herd with a substantial chronic bTB problem. Even with liberal interpretation of the  
390 serology test (IDEXX) data, few animals were removed, and tuberculous like lesions were  
391 not observed in any of those culled nor could *M. bovis* be isolated from samples taken from  
392 these animals. One animal that was serologically tested, and found negative, was  
393 subsequently found to have visible lesions and confirmed for *M. bovis* post-mortem. This  
394 field application of the test in a particularly problematic herd appears to corroborate our  
395 findings from the prospective study results. However, other case-studies have highlighted  
396 benefits of serology as ancillary tests in eradicating TB. For example, a red deer herd in  
397 England with a TB outbreak was cleared of infection with the use of both tuberculin testing  
398 and serological testing over a 2-year period (30). The authors suggest that without the  
399 additional removal of serologically test positive, the time to eradication may have been  
400 significantly increased as well as contributing to maintenance and potential transmission to  
401 local wildlife. O'Brien et al. (28) also describes a case-study in a goat herd where skin tests  
402 failed to identify all infected animals, with 6/20 slaughtered animals having visible lesions  
403 and serologically positive to six *M. bovis* antigens.

404 Serological tests could be strategically useful in the case of anergic animals, where advanced  
405 and generalised infection is present leading to failure to respond to SICCT due to an impaired  
406 cell mediated immunity (CMI) response (12). However, currently there is limited data on the  
407 proportion of animals that could be deemed anergic in Northern Ireland farms. Potentially, the



408 repeated application of SICCT testing over an animal's lifetime could lead to desensitisation  
409 (12, 37), again resulting in false negatives. When we looked at the impact of age on the  
410 probability of disclosure, we found no significant variation in our cohort. We found some weak  
411 evidence for variation in disclosure depending on breed-type, with generally Friesian/Holstein  
412 cattle exhibiting lower probability of disclosing serology positive (though this effect appeared  
413 to be only large on one of the tests, Enfer 4ag). Further research is required to ascertain whether  
414 this is a robust finding – there is significant uncertainty with the current study given the very  
415 small numbers of animals serologically test-positive. However, previous research has  
416 suggested that there may be significant variation in *M. bovis* susceptibility and pathology across  
417 breeds (38, 39), which could be partially attributed to immunological or genetic variation (40),  
418 or other management factors.

419

## 420 **Conclusions**

421 We have shown that two available serological tests, when applied to cattle populations with  
422 moderate prevalence and with samples taken prior to tuberculin testing, can exhibit limited  
423 apparent sensitivities but very high specificities. Serological tests can disclose additional test-  
424 positive animals when used in parallel with the skin tuberculin test. However, we found in  
425 this study, that when IFN $\gamma$  was used instead of, or in parallel with, SICCT, there were no *M.*  
426 *bovis* confirmed animals identified by the serological tests employed. This suggests, where  
427 both SICCT and IFN $\gamma$  are used together, there may be limited opportunities to detect  
428 additional missed infected animals via the serological tests examined when samples were  
429 taken prior to skin testing. From a perspective of a country with an ongoing extensive  
430 eradication scheme, future strategic use of serology may be limited to: 1. extreme cases of  
431 very large breakdowns within herds leading to high within-herd bTB prevalence, 2. in  
432 problem herds where IFN $\gamma$  testing is unavailable, and 3. chronically infected herds where

433 blood samples are taken after tuberculin testing to maximise sensitivity gained from any  
434 anamnestic effects.

435

#### 436 **Authors' contributions**

437 JMN, AB, FY, LMC contributed to the study design. LMC, C Brooks, C Barry, CC  
438 supervised sample preparation/testing and contributed to data validation/collation. JMN, AB,  
439 LMC analysed the data and prepared an initial draft manuscript. All authors reviewed and  
440 commented on the manuscript prior to submission. The authors declare they have no conflict  
441 of interest.

442

#### 443 **Acknowledgements**

444 This study was funded by the Department of Agriculture, Environment and Rural Affairs  
445 (DAERA) as part of the Evidence and Innovation Strategy under the grant “An assessment of  
446 commercially available serological tests for the detection of cattle infected with bovine  
447 tuberculosis” (grant no.: 15/3/09; Project Leaders: Dr J. McNair and Dr A. Byrne). We thank  
448 the TB Immunology, TB Culture and TB Molecular laboratories at AFBI for their expertise  
449 in interferon gamma testing, bacteriology, and molecular confirmation techniques,  
450 respectively, as well as Jordon Graham for his assistance with capturing data from the  
451 Animal and Public Health Information System (APHIS).

452

453

454

455 **References**

- 456 1. Zinsstag J, Schelling E, Roth F, Kazwala RR. 2006. Economics of bovine tuberculosis. *In*  
457 Thoen CO (Ed.), *Mycobacterium bovis* infection in animals and humans. 2<sup>nd</sup> edition.  
458 Blackwell Publishing, pp. 68-83.
- 459 2. O'Reilly LM, Daborn CJ 1995. The epidemiology of *Mycobacterium bovis* infections in  
460 animals and man: a review. *Tuber Lung Dis.* 76:1-46.
- 461 3. Abernethy DA, Denny GO, Menzies FD, McGuckian P, Honhold N, Roberts AR. 2006.  
462 The Northern Ireland programme for the control and eradication of *Mycobacterium bovis*.  
463 *Vet Microbiol.* 112:231-237.
- 464 4. Skuce RA, McDowell SW, Mallon TR, Luke B, Breadon EL, Lagan PL, McCormick CM,  
465 McBride SH, Pollock JM. 2005. Discrimination of isolates of *Mycobacterium bovis* in  
466 Northern Ireland on the basis of variable numbers of tandem repeats (VNTRs). *Vet Rec.*  
467 157:501.
- 468 5. Abernethy DA, Upton P, Higgins IM, McGrath G, Goodchild AV, Rolfe SJ, Broughan  
469 JM, Downs SH, Clifton-Hadley R, Menzies FD, De la Rua-Domenech R. 2013. Bovine  
470 tuberculosis trends in the UK and the Republic of Ireland, 1995–2010. *Vet Rec.* 172:312-312.
- 471 6. Palmer MV. 2007. Tuberculosis: a re-emerging disease at the interface of domestic animals  
472 and wildlife. In *Wildlife and Emerging Zoonotic Diseases: The Biology, Circumstances and*  
473 *Consequences of Cross-Species Transmission* (pp. 195-215). Springer Berlin Heidelberg.
- 474 7. Byrne AW, White PW, McGrath G, O’Keeffe J, Martin SW. 2014. Risk of tuberculosis  
475 cattle herd breakdowns in Ireland: effects of badger culling effort, density and historic large-  
476 scale interventions. *Vet Res.* 45:1.

- 477 8. Byrne AW, Graham J, Brown C, Donaghy A, Guelbenzu-Gonzalo M, McNair J, Skuce R,  
478 Allen A, McDowell S. 2017. Bovine tuberculosis visible lesions in cattle culled during herd  
479 breakdowns: the effects of individual characteristics, trade movement and co-infection. BMC  
480 Vet Res. 13(1):400.
- 481 9. Byrne AW, Guelbenzu-Gonzalo M, Strain SAJ, McBride S, Graham J, Lahuerta-Marin A,  
482 Harwood R, Graham DA, McDowell S. 2017. Assessment of concurrent infection with  
483 bovine viral diarrhoea virus (BVDV) and *Mycobacterium bovis*: a herd-level risk factor  
484 analysis from Northern Ireland. Prev Vet Medicine. 141:38-47.
- 485 10. Álvarez J, De Juan L, Bezos J, Romero B, Sáez JL, Marqués S, Domínguez C, Mínguez  
486 O, Fernández-Mardomingo B, Mateos A, Domínguez L. 2009. Effect of paratuberculosis on  
487 the diagnosis of bovine tuberculosis in a cattle herd with a mixed infection using interferon-  
488 gamma detection assay. Vet Microbiol. 135:389-393.
- 489 11. Pollock JM, Welsh MD, McNair J (2005) Immune responses in bovine tuberculosis:  
490 towards new strategies for the diagnosis and control of disease. Vet Immunol Immunopathol.  
491 108:37–43.
- 492 12. de la Rua-Domenech R, Goodchild AT, Vordermeier HM, Hewinson RG, Christiansen  
493 KH, Clifton-Hadley RS. 2006. Ante mortem diagnosis of tuberculosis in cattle: a review of  
494 the tuberculin tests,  $\gamma$ -interferon assay and other ancillary diagnostic techniques. Res Vet Sci.  
495 81:190-210.
- 496 13. Lahuerta-Marin A, Milne G, McNair J, Skuce R., McBride S., Menzies F. , McDowell  
497 S.J.W., Byrne A.W., Handel I.G., Bronsvoort M.B.C. 2018. Bayesian Latent Class  
498 estimation of sensitivity and specificity parameters of diagnostic tests for bovine tuberculosis  
499 in chronically infected herds in Northern Ireland. Vet J. 238:15-21.

- 500 14. McCallan L, Brooks C, Couzens C, Young F, McNair J, Byrne AW. 2017. Assessment of  
501 serological tests for diagnosis of bovine tuberculosis. *Vet Rec.* 181: 90.
- 502 15. Welsh MD, McNair J, McDowell SWJ, Buchanan J, Hill R, McBride SH, Clarke N.  
503 2008. The Northern Ireland Interferon-gamma (IFN-g) Testing Programme. *Cattle Practice.*  
504 16:136-139.
- 505 16. Lahuerta-Marin A, Gallagher M, McBride S, Skuce R, Menzies F, McNair J, McDowell  
506 SW, Byrne AW. 2015. Should they stay, or should they go? Relative future risk of bovine  
507 tuberculosis for interferon-gamma test-positive cattle left on farms. *Vet Res.* 46:1.
- 508 17. Lahuerta-Marin A, McNair J, Skuce R, McBride S, Allen M, Strain SA, Menzies FD,  
509 McDowell SJ, Byrne AW. 2016. Risk factors for failure to detect bovine tuberculosis in cattle  
510 from infected herds across Northern Ireland (2004–2010). *Res Vet Sci.* 107:233-239.
- 511 18. Welsh MD, Cunningham RT, Corbett DM, Girvin RM, McNair J, Skuce RA, Bryson DG,  
512 Pollock JM. 2005. Influence of pathological progression on the balance between cellular and  
513 humoral immune responses in bovine tuberculosis. *Immunol.* 114:101-111.
- 514 19. Pollock JM, Neill SD. 2002. *Mycobacterium bovis* infection and tuberculosis in cattle.  
515 *Vet J.* 163:115-127.
- 516 20. Whelan C, Shuralev E, O'Keeffe G, Hyland P, Kwok HF, Snoddy P, O'Brien A, Connolly  
517 M, Quinn P, Groll M, Watterson T. 2008. Multiplex immunoassay for serological diagnosis  
518 of *Mycobacterium bovis* infection in cattle. *Clin Vac Immunol.* 15:1834-1838.
- 519 21. Stewart LD, McNair J, McCallan L, Gordon A, Grant IR. 2013. Improved detection of  
520 *Mycobacterium bovis* infection in bovine lymph node tissue using immunomagnetic  
521 separation (IMS)-based methods. *PloS One.* 8:3.

- 522 22. Kamerbeek J, Schouls LE, Kolk A, Van Agterveld M, Van Soolingen D, Kuijper S,  
523 Bunschoten A, Molhuizen H, Shaw R, Goyal M, Van Embden J. 1997. Simultaneous  
524 detection and strain differentiation of *Mycobacterium tuberculosis* for diagnosis and  
525 epidemiology. *J Clin Microbiol.* 35:907-14.
- 526 23. Hosmer DW, Lemeshow S. 2004. *Applied logistic regression.* John Wiley & Sons.
- 527 24. Whelan C, Whelan AO, Shuralev E, Kwok HF, Hewinson G, Clarke J, Vordermeier HM.  
528 2010. Performance of the Enferplex TB assay with cattle in Great Britain and assessment of  
529 its suitability as a test to distinguish infected and vaccinated animals. *ClinVaccine Immunol.*  
530 17:813-817.
- 531 25. McCallan L, Brooks C, Couzens C, Young F, McNair J, Byrne AW. 2017. Data from  
532 Performance of serological antibody tests for bovine tuberculosis in cattle from infected herds  
533 in Northern Ireland. Figshare. <https://figshare.com/s/db7f5956d1094066180a> DOI:  
534 10.6084/m9.figshare.5705893
- 535 26. Waters WR, Buddle BM, Vordermeier HM, Gormley E, Palmer MV, Thacker TC,  
536 Bannantine JP, Stabel JR, Linscott R, Martel E, Milian F. 2011. Development and evaluation  
537 of an enzyme-linked immunosorbent assay for use in the detection of bovine tuberculosis in  
538 cattle. *ClinVaccine Immunol.* 18:1882-1888.
- 539 27. Casal C, Infantes JA, Rivalde MA, Díez-Guerrier A, Domínguez M, Moreno I, Romero B,  
540 de Juan L, Sáez JL, Juste R, Gortázar C. 2017. Antibody detection tests improve the  
541 sensitivity of tuberculosis diagnosis in cattle. *Res Vet Sci.* 112:214-21.
- 542 28. O'Brien A, Whelan C, Clarke JB, Hayton A, Watt NJ, Harkiss GD. 2017. Serological  
543 Analysis of Tuberculosis in Goats by Use of the Enferplex Caprine TB Multiplex Test. *Clin*  
544 *Vaccine Immunol.* 24:2.

- 545 29. Casal C, Díez-Guerrier A, Álvarez J, Rodríguez-Campos S, Mateos A, Linscott R, Martel  
546 E, Lawrence JC, Whelan C, Clarke J, O'Brien A, Domínguez L, Aranaz A. 2014. Strategic  
547 use of serology for the diagnosis of bovine tuberculosis after intradermal skin testing. *Vet*  
548 *Micro*, 170:342-51.
- 549 30. Busch F, Bannerman F, Liggett S, Griffin F, Clarke J, Lyashchenko KP, Rhodes S. 2017.  
550 Control of bovine tuberculosis in a farmed red deer herd in England. *Vet Rec.* 180:68.
- 551 31. Wood PR, Corner LA, Rothel JS, Ripper JL, Fifis T, McCormick BS, Francis B, Melville  
552 L, Small K, De Witte K, Tolson J. 1992. A field evaluation of serological and cellular  
553 diagnostic tests for bovine tuberculosis. *Vet Microbiol.* 31:71-79.
- 554 32. Waters WR, Palmer MV, Thacker TC, Bannantine JP, Vordermeier HM, Hewinson RG,  
555 Greenwald R, Esfandiari J, McNair J, Pollock JM, Andersen P. 2006. Early antibody  
556 responses to experimental *Mycobacterium bovis* infection of cattle. *Clin Vaccine Immunol.*  
557 13:648-54.
- 558 33. Waters WR, Maggioli MF, McGill J, Lyashchenko KP, Palmer MV. 2014. Relevance of  
559 bovine tuberculosis research to the understanding of human disease: Historical perspectives,  
560 approaches and immunologic mechanisms. *Vet Immunol Immunopathol.* 159:113-132.
- 561 34. Waters WR, Thacker TC, Nelson JT, DiCarlo DM, Maggioli MF, Greenwald R,  
562 Esfandiari J, Lyashchenko KP, Palmer MV. 2014. Virulence of two strains of *Mycobacterium*  
563 *bovis* in cattle following aerosol infection. *J Com Pathol.* 151:410-419.
- 564 35. Waters WR, Palmer MV, Stafne MR, Bass KE, Maggioli MF, Thacker TC, Linscott R,  
565 Lawrence JC, Nelson JT, Esfandiari J, Greenwald R. 2015. Effects of serial skin testing with  
566 purified protein derivative on the level and quality of antibodies to complex and defined  
567 antigens in *Mycobacterium bovis*-infected cattle. *Clin Vaccine Immunol.* 6:641-649.

- 568 36. de la Rúa-Domenech R, Rhodes S, Rolfe S, Vordermeier M. 2017. The anamnestic boost  
569 effect of the skin test on antibody responses to *Mycobacterium bovis* in camelids – summary  
570 of evidence.  
571 [http://www.alpacatb.com/anamnestic%20antibody%20response%20\(scientific%20evidence\)  
%20\(2\).pdf](http://www.alpacatb.com/anamnestic%20antibody%20response%20(scientific%20evidence)<br/>572 %20(2).pdf)
- 573 37. Monaghan ML, Doherty ML, Collins JD, Kazda JF, Quinn PJ. 1994. The tuberculin test.  
574 Vet Microbiol. 40:111-24.
- 575 38. Ameni G, Aseffa A, Engers H, Young D, Gordon S, Hewinson G, Vordermeier M. 2007.  
576 High prevalence and increased severity of pathology of bovine tuberculosis in Holsteins  
577 compared to zebu breeds under field cattle husbandry in central Ethiopia. Clin Vaccine  
578 Immunol. 14:1356-1361.
- 579 39. Wright DM, Allen AR, Mallon TR, McDowell SW, Bishop SC, Glass EJ, Bermingham  
580 ML, Woolliams JA, Skuce RA. 2013. Field-isolated genotypes of *Mycobacterium bovis* vary  
581 in virulence and influence case pathology but do not affect outbreak size. PloS One.  
582 8:e74503.
- 583 40. Allen AR, Skuce, RA, Byrne AW. 2018. Bovine tuberculosis in Britain and Ireland–A  
584 Perfect Storm? The confluence of potential ecological and epidemiological impediments to  
585 controlling a chronic infectious disease. Front Vet Sci. 5:109.



586 **Table 1: The relative performance of serological tests against statutory ante-mortem tests. Skin**  
 587 **test = SICCT standard interpretation. aOR: adjusted Odds Ratio.**

588

| Test type   | n          | Comparator   | aOR         | P-value      | AUC         | Sens         | Spec          | PPV           | NPV           | Prev. (comparator) | Test prev.   |
|-------------|------------|--------------|-------------|--------------|-------------|--------------|---------------|---------------|---------------|--------------------|--------------|
| ENFER 2ag   | 919        | Skin test    | 2.97        | 0.008        | 0.52        | 7.44%        | 97.40%        | 30.00%        | 87.40%        | 13%                | 3.26%        |
| ENFER 2ag   | 920        | IFN $\gamma$ | 2.73        | 0.009        | 0.52        | 5.22%        | 98.00%        | 63.30%        | 61.20%        | 40%                | 3.26%        |
| ENFER 4ag   | 919        | Skin test    | 4.26        | 0.012        | 0.52        | 4.13%        | 99.00%        | 38.50%        | 87.20%        | 13%                | 1.41%        |
| ENFER 4ag   | 920        | IFN $\gamma$ | 5.21        | 0.013        | 0.51        | 2.75%        | 99.50%        | 76.90%        | 61.00%        | 40%                | 1.41%        |
| IDEXX       | 921        | Skin test    | 2.66        | 0.008        | 0.53        | 9.09%        | 96.40%        | 27.50%        | 87.50%        | 13%                | 4.34%        |
| IDEXX       | 922        | IFN $\gamma$ | 1.73        | 0.091        | 0.51        | 5.75%        | 96.60%        | 52.50%        | 61.00%        | 40%                | 4.34%        |
| <b>Mean</b> | <b>920</b> |              | <b>3.26</b> | <b>0.024</b> | <b>0.52</b> | <b>5.73%</b> | <b>97.82%</b> | <b>48.12%</b> | <b>74.22%</b> | <b>27%</b>         | <b>3.00%</b> |

589

590

591 **Table 2: The relative performance of serological tests against statutory post-mortem diagnostic**  
 592 **techniques.**

593

| Test type   | n          | Comparator     |  Odds ratio | P-value      | AUC         | Sens          | Spec          | PPV           | NPV           |  Prev. (comparator) | Test prev.   |
|-------------|------------|----------------|----------------------------------------------------------------------------------------------|--------------|-------------|---------------|---------------|---------------|---------------|--------------------------------------------------------------------------------------------------------|--------------|
| ENFER 2ag   | 283        | Visible lesion | 5.88                                                                                         | 0.002        | 0.55        | 12.80%        | 97.60%        | 66.70%        | 74.60%        | 28%                                                                                                    | 5.30%        |
| ENFER 2ag   | 285        | Confirmed      | 5.03                                                                                         | 0.003        | 0.55        | 12.70%        | 97.20%        | 60.00%        | 77.00%        | 25%                                                                                                    | 5.26%        |
| ENFER 4ag   | 283        | Visible lesion | 6.63                                                                                         | 0.007        | 0.54        | 8.97%         | 98.50%        | 70.00%        | 68.40%        | 28%                                                                                                    | 3.53%        |
| ENFER 4ag   | 285        | Confirmed      | 7.69                                                                                         | 0.004        | 0.54        | 9.86%         | 98.60%        | 70.00%        | 76.50%        | 25%                                                                                                    | 3.51%        |
| IDEXX       | 284        | Visible lesion | 5.47                                                                                         | 0.001        | 0.56        | 14.10%        | 97.10%        | 64.70%        | 74.90%        | 27%                                                                                                    | 5.99%        |
| IDEXX       | 286        | Confirmed      | 4.87                                                                                         | 0.002        | 0.55        | 14.10%        | 96.70%        | 58.80%        | 77.30%        | 25%                                                                                                    | 5.94%        |
| <b>Mean</b> | <b>284</b> |                | <b>5.93</b>                                                                                  | <b>0.003</b> | <b>0.55</b> | <b>12.09%</b> | <b>97.62%</b> | <b>65.03%</b> | <b>74.78%</b> | <b>26%</b>                                                                                             | <b>4.92%</b> |

594

595

596 **Table 3: The relative performance of serological tests against a combination of statutory ante-**  
 597 **mortem and post-mortem diagnostic techniques. Positive status animals were positive to SICCT,**  
 598 **had a visible lesion (VL) at slaughter and had bacteriologically confirmed infection; negative**  
 599 **status animals were negative to SICCT, VL and were not confirmed at slaughter.**

600

| Test type   | n          | Comparator           | Odds ratio   | P-value      | AUC         | Sens         | Spec          | PPV           | NPV           | Prev. (comparator) | Test prev.   |
|-------------|------------|----------------------|--------------|--------------|-------------|--------------|---------------|---------------|---------------|--------------------|--------------|
| ENFER 2ag   | 187        | SICCT + VL + CONFIRM | 14.20        | 0.019        | 0.54        | 9.09%        | 99.30%        | 80.00%        | 78.02%        | 24%                | 2.67%        |
| ENFER 4ag   | 187        | SICCT + VL + CONFIRM | 10.39        | 0.045        | 0.53        | 6.82%        | 99.30%        | 75.00%        | 77.60%        | 24%                | 2.14%        |
| IDEXX       | 188        | SICCT + VL + CONFIRM | 7.42         | 0.006        | 0.56        | 13.64%       | 97.92%        | 66.67%        | 78.77%        | 31%                | 6.25%        |
| <b>Mean</b> | <b>187</b> |                      | <b>10.67</b> | <b>0.023</b> | <b>0.54</b> | <b>9.85%</b> | <b>98.84%</b> | <b>73.89%</b> | <b>78.13%</b> | <b>26%</b>         | <b>3.69%</b> |

601

602

603 **Table 4: The relative performance of serological tests against a combination of statutory ante-**  
 604 **mortem and post-mortem diagnostic techniques. Positive status animals were positive to SICCT,**  
 605 **Interferon-G, had a visible lesion (VL) at slaughter and had bacteriologically confirmed**  
 606 **infection; negative status animals were negative to SICCT, IFN $\gamma$ , VL and were not confirmed at**  
 607 **slaughter.**

608

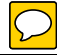

| Test type   | n         | Comparator                          | Odds ratio | P-value | AUC*        | Sens          | Spec           | PPV            | NPV           | Prev. (comparator) | Test prev.   |
|-------------|-----------|-------------------------------------|------------|---------|-------------|---------------|----------------|----------------|---------------|--------------------|--------------|
| ENFER 2ag   | 68        | SICCT + IFN $\gamma$ + VL + CONFIRM | NA         | NA      | 0.55        | 10.00%        | 100.00%        | 100.00%        | 43.75%        | 59%                | 5.88%        |
| ENFER 4ag   | 68        | SICCT + IFN $\gamma$ + VL + CONFIRM | NA         | NA      | 0.54        | 7.50%         | 100.00%        | 100.00%        | 43.08%        | 59%                | 4.41%        |
| IDEXX       | 68        | SICCT + IFN $\gamma$ + VL + CONFIRM | NA         | NA      | 0.58        | 15.00%        | 100.00%        | 100.00%        | 45.16%        | 59%                | 8.82%        |
| <b>Mean</b> | <b>68</b> |                                     |            |         | <b>0.55</b> | <b>10.83%</b> | <b>100.00%</b> | <b>100.00%</b> | <b>44.00%</b> | <b>59%</b>         | <b>6.37%</b> |

609

610

611 Table 5  bulation of the relationship between serological test result, gamma interferon (IFN $\gamma$ )  
 612 status and skin test status. Numbers italicised represent ante-mortem negative animals that   
 613 were serologically test positive.

614

|               | IFN $\gamma$ - | IFN $\gamma$ + |              | IFN $\gamma$ - | IFN $\gamma$ + |               | IFN $\gamma$ - | IFN $\gamma$ + |
|---------------|----------------|----------------|--------------|----------------|----------------|---------------|----------------|----------------|
| <b>SICCT-</b> | <b>Enfer</b>   |                | <b>Enfer</b> |                |                | <b>IDEXX-</b> |                |                |
|               | <b>2ag-</b>    | 505            | <b>4ag-</b>  | 511            | 279            | <b>IDEXX+</b> | 497            | 274            |
|               | <b>Enfer</b>   |                | <b>Enfer</b> |                |                |               |                |                |
|               | <b>2ag+</b>    | 8              | <b>4ag+</b>  | 2              | 6              |               | 17             | 12             |
| <b>SICCT+</b> | <b>Enfer</b>   |                | <b>Enfer</b> |                |                | <b>IDEXX-</b> |                |                |
|               | <b>2ag-</b>    | 39             | <b>4ag-</b>  | 41             | 75             | <b>IDEXX+</b> | 40             | 70             |
|               | <b>Enfer</b>   |                | <b>Enfer</b> |                |                |               |                |                |
|               | <b>2ag+</b>    | 3              | <b>4ag+</b>  | 1              | 4              |               | 2              | 9              |

615

616 **Table 6: Proportion of confirmed infected animals with positive serological test results, which were**  
 617 **missed by SICCT, IFN $\gamma$ , or both ante mortem bovine TB tests.**

618

| <b>Confirmed infection</b>               | <b>ENFER<br/>2ag</b> | <b>ENFER<br/>4ag</b> | <b>IDEXX</b> |
|------------------------------------------|----------------------|----------------------|--------------|
| <b>SICCT- (n)</b>                        | 3/19                 | 2/19                 | 3/19         |
| <b>(% serology positive)</b>             | 15.79%               | 10.53%               | 15.79%       |
| <b>IFN<math>\gamma</math> -</b>          | 0/14                 | 0/14                 | 0/14         |
| <b>(% serology positive)</b>             | 0%                   | 0%                   | 0%           |
| <b>SICCT or IFN<math>\gamma</math> -</b> | 0/6                  | 0/6                  | 0/6          |
| <b>(% serology positive)</b>             | 0%                   | 0%                   | 0%           |

619

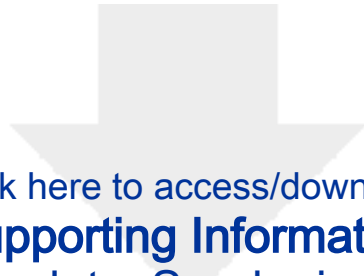

Click here to access/download

**Supporting Information**

raw\_results\_data\_Serological\_tests.xlsx

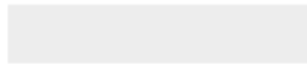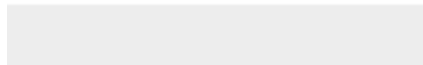

Supplement: pone.0245655.s002.pdf [file pone.0245655.s002.pdf]
